# Supplementary material
Source: PubMed Central journal article supplement (PMC3686099)
Supplement: NIHMS351002-supplement-Fig_S1.pdf [file NIHMS351002-supplement-Fig_S1.pdf]

**PROTEASOME**

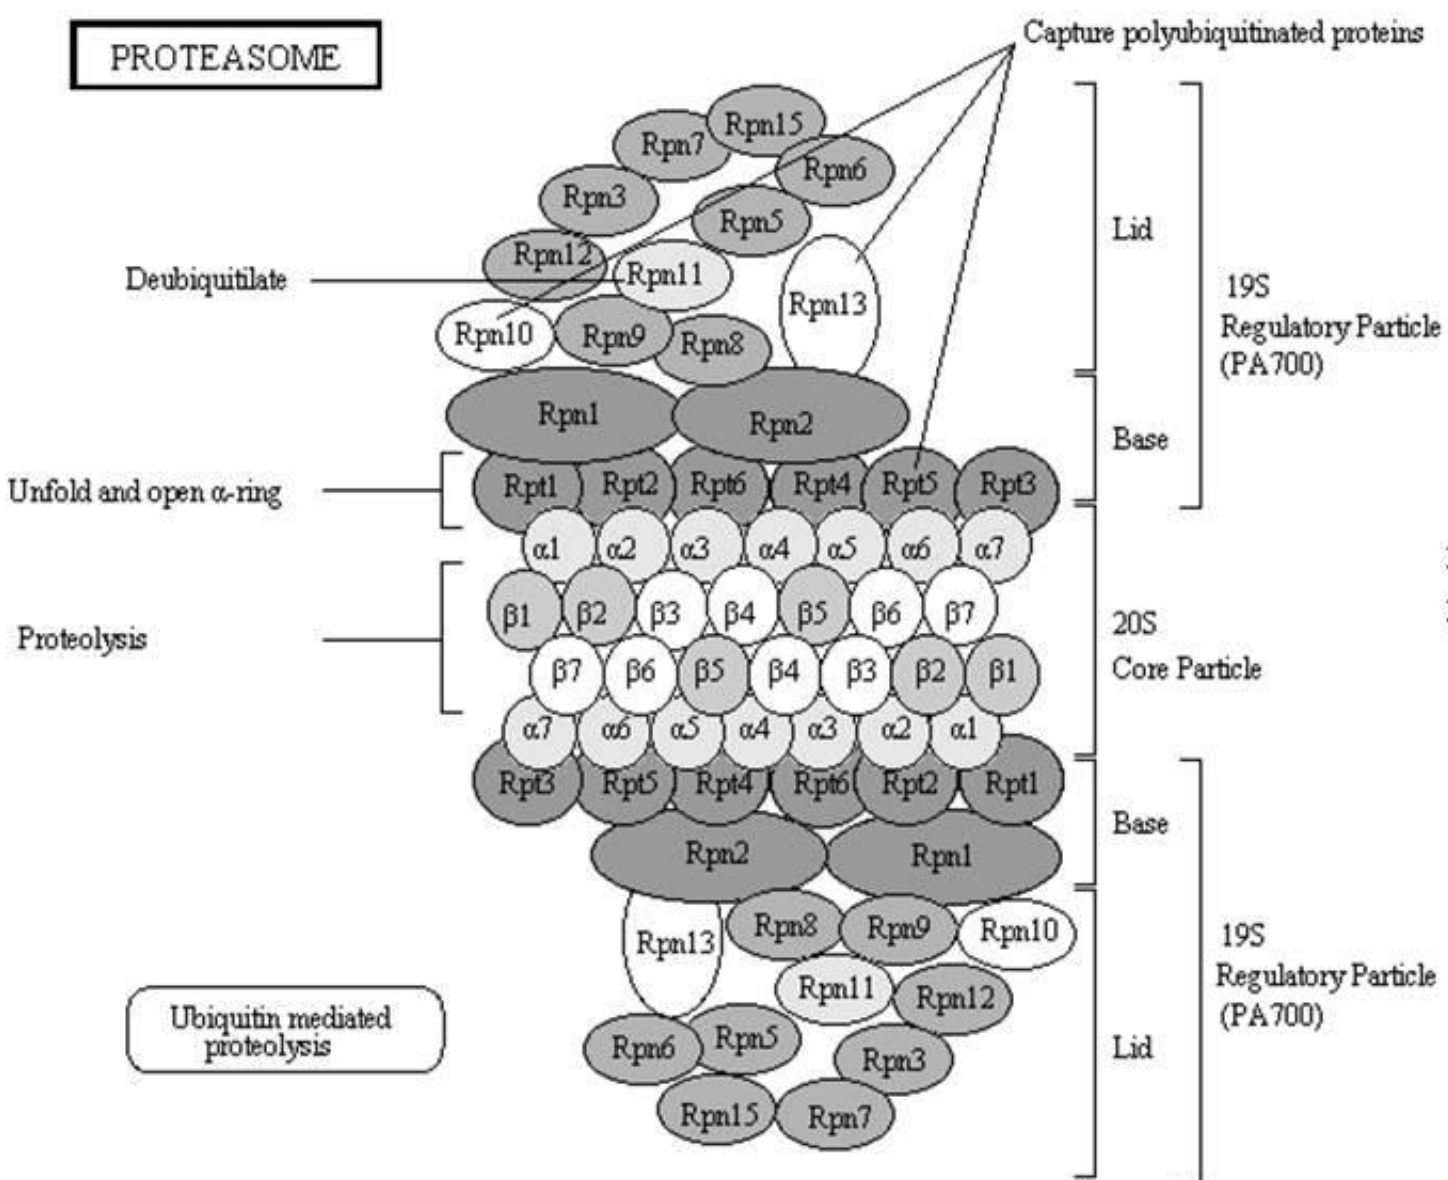

PA700-20S-PA700 (26S proteasome)

Regulatory Particles

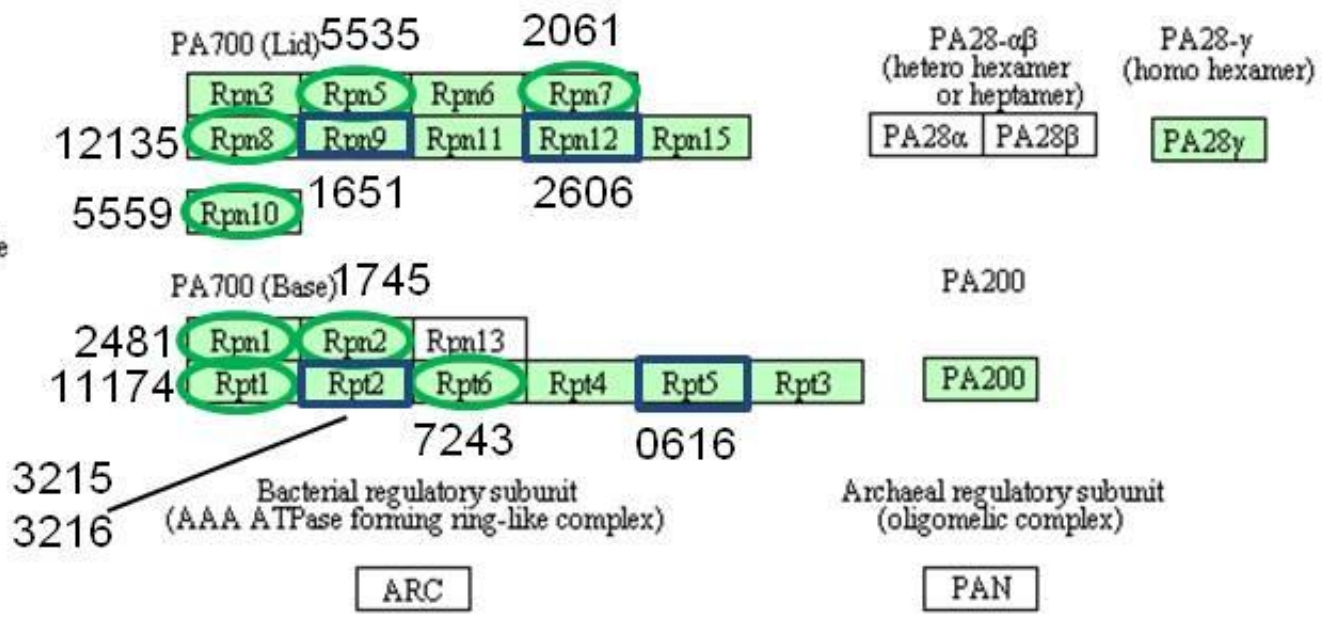

Core Particles (20S proteasome)

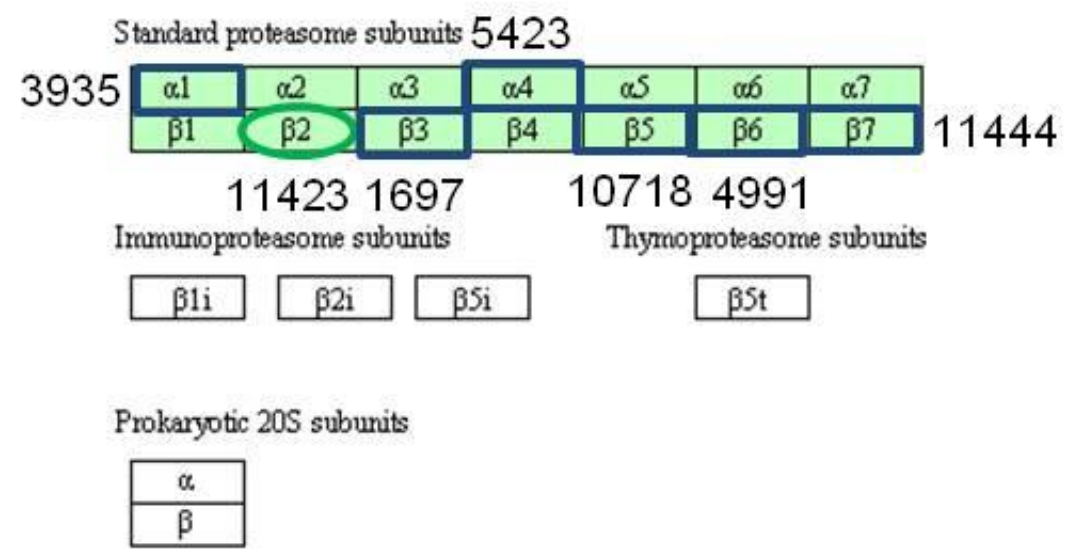

Formation of immunoproteasomes

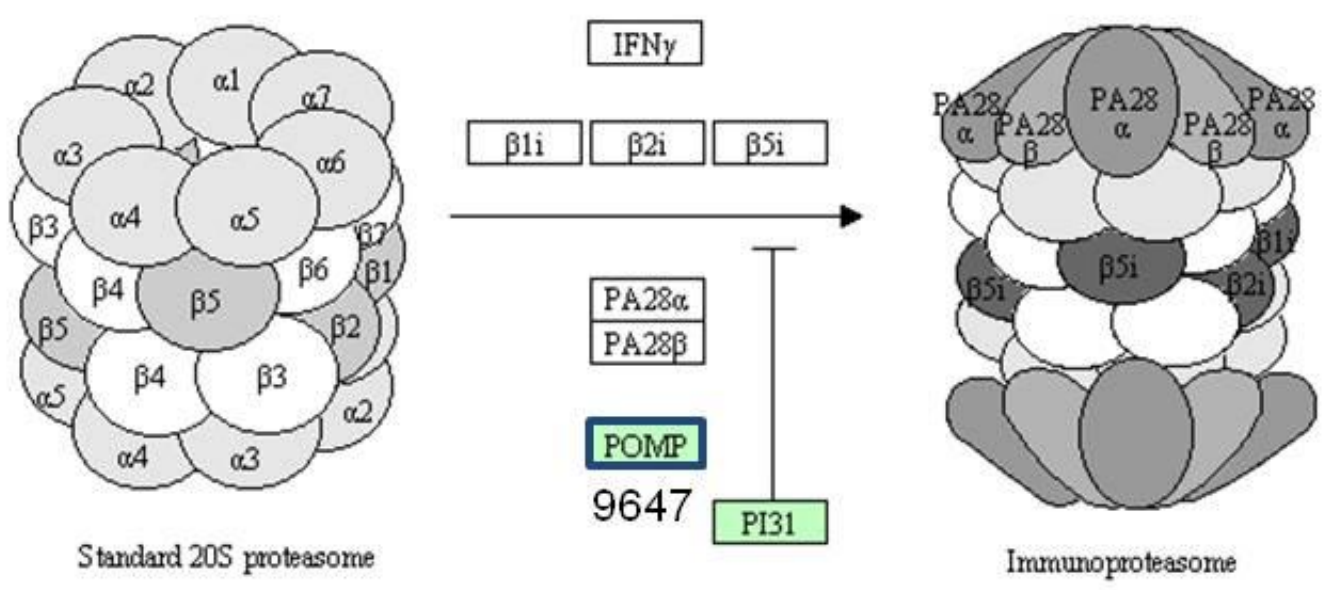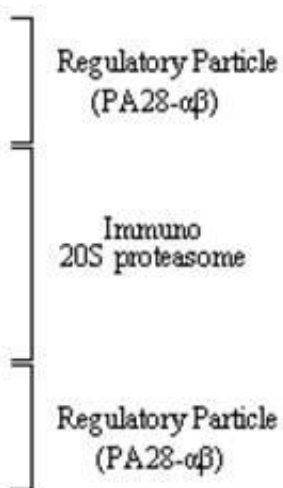

○ gene upregulated in 2La  
 □ gene upregulated in 2La and downregulated in 2La\*
