# Supplementary material
Source: PubMed Central journal article supplement (PMC3686099)

# CITRATE CYCLE (TCA CYCLE)

  gene upregulated in 2La  
  gene upregulated in 2La and downregulated in 2La<sup>+</sup>

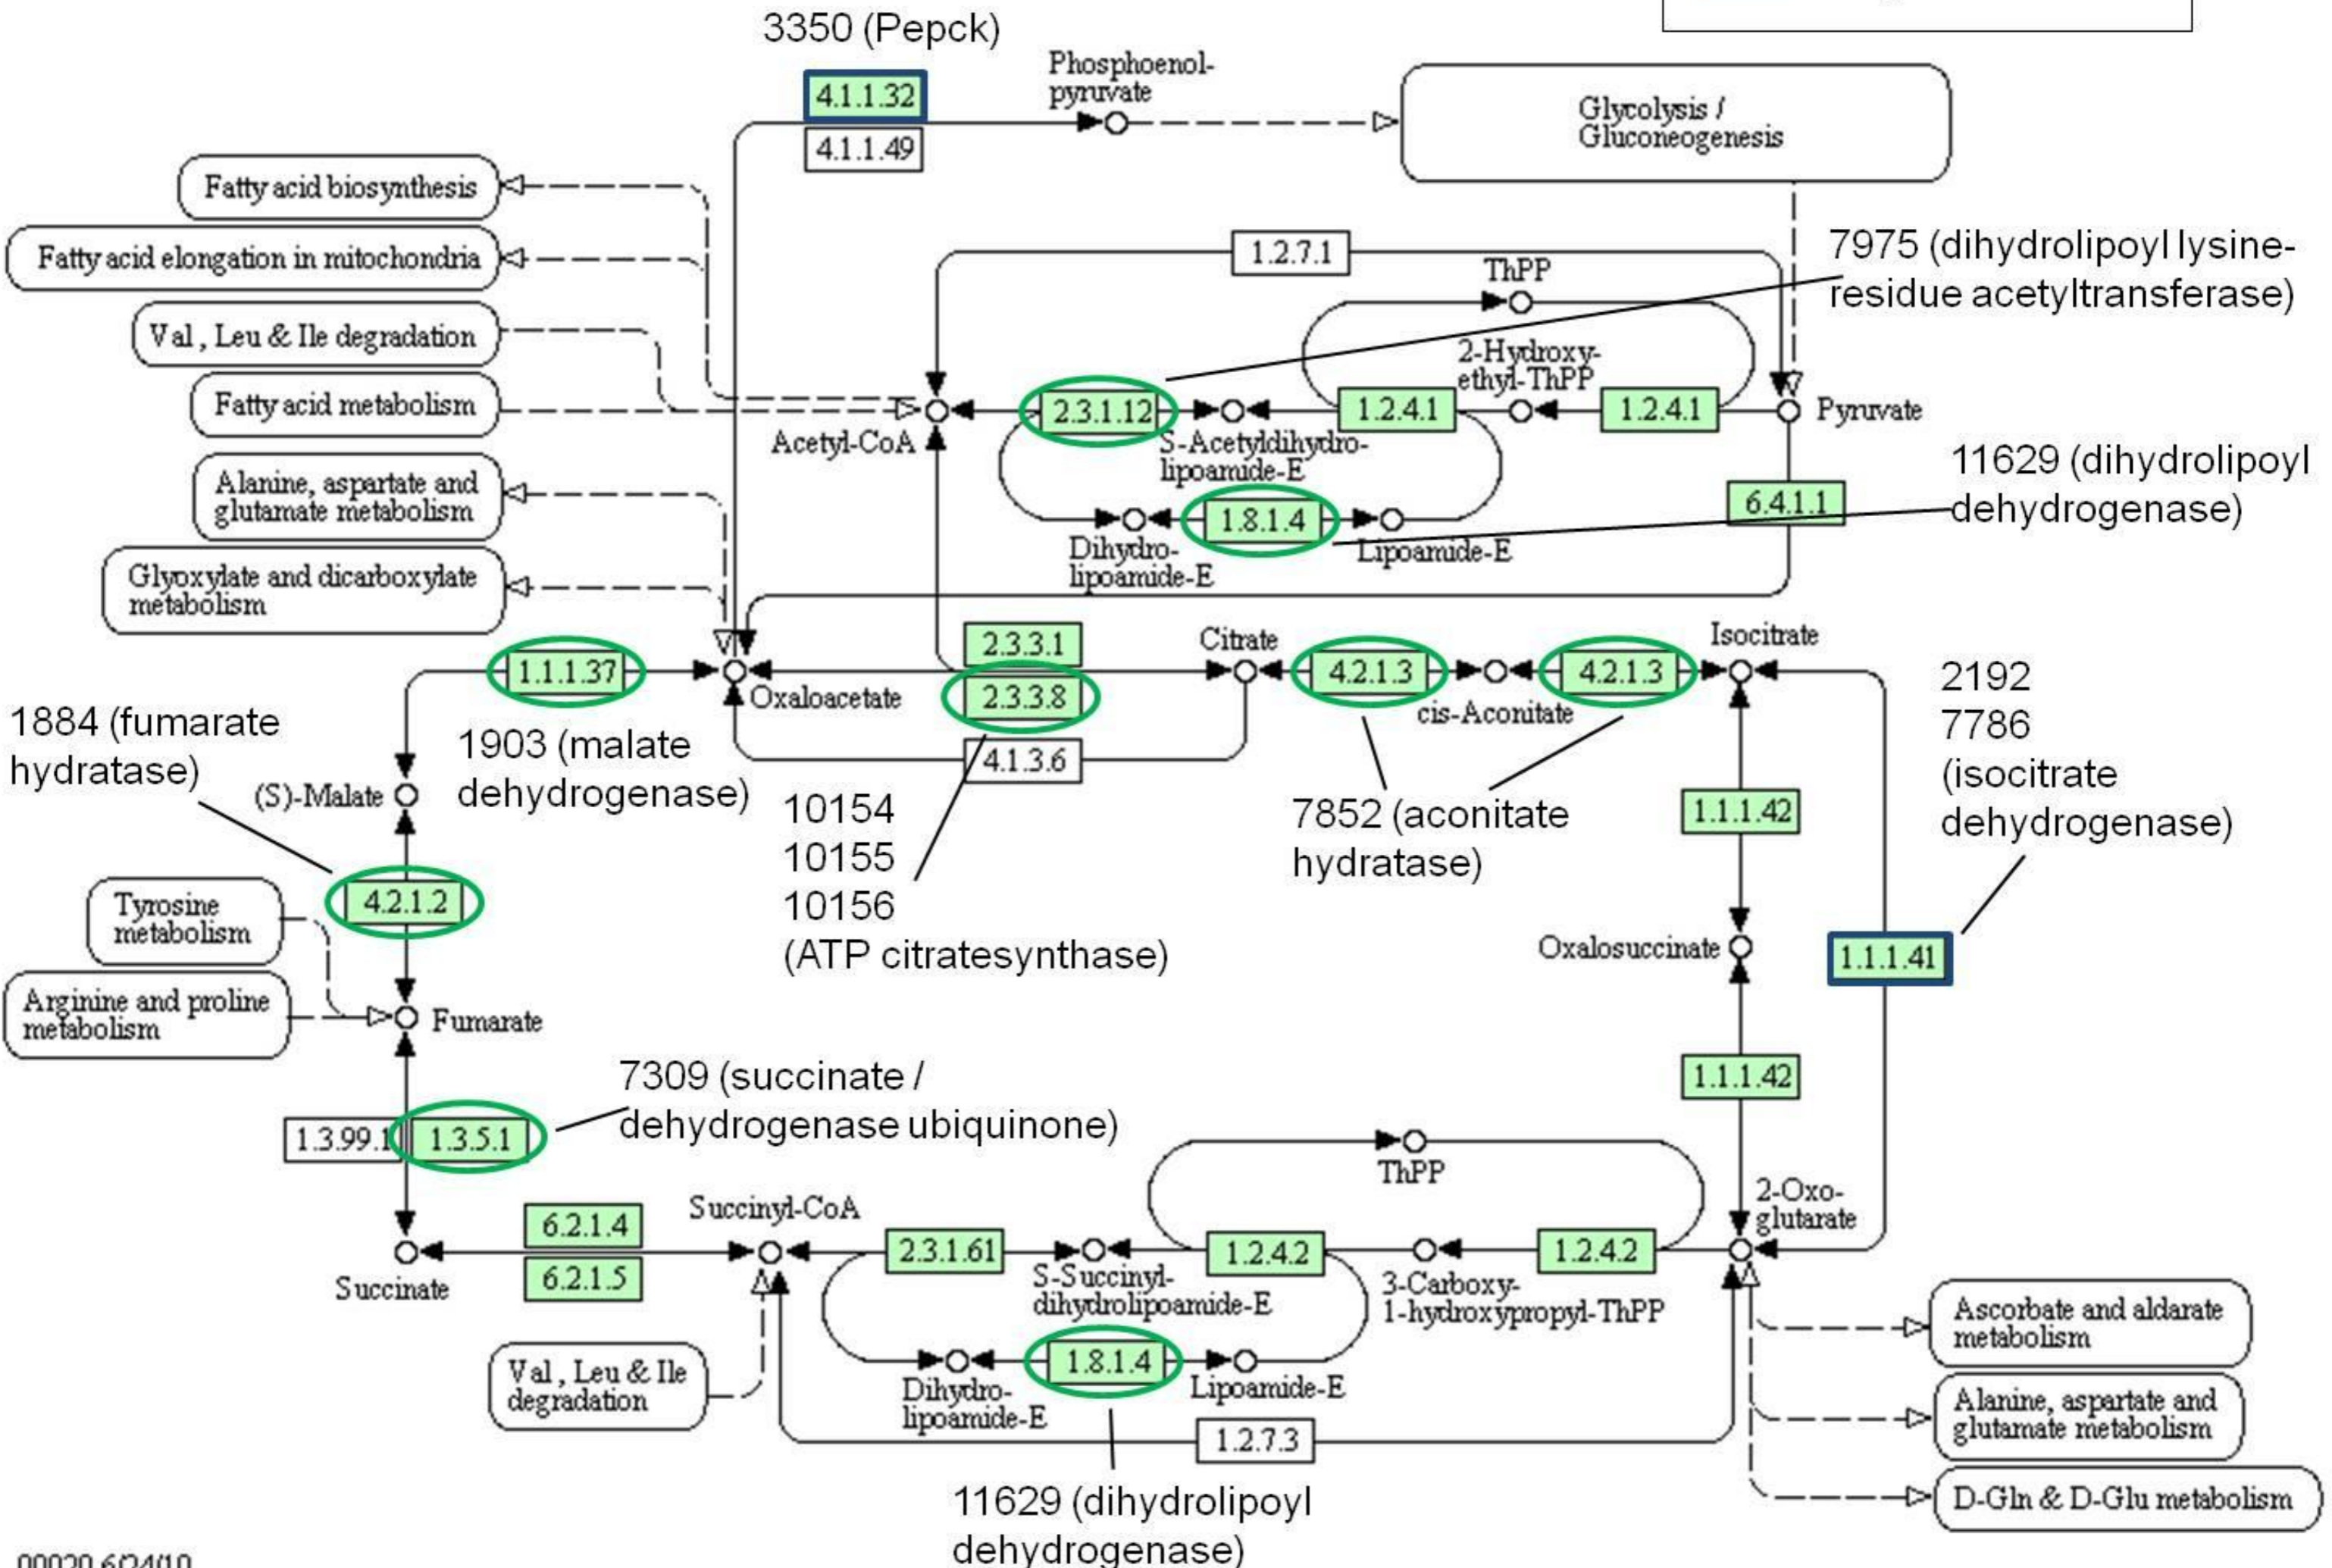

Supplement: NIHMS351002-supplement-Fig_S2.pdf [file NIHMS351002-supplement-Fig_S2.pdf]
