# Supplementary material
Source: PubMed Central journal article supplement (PMC3686099)
Supplement: NIHMS351002-supplement-Fig_S4.pdf [file NIHMS351002-supplement-Fig_S4.pdf]

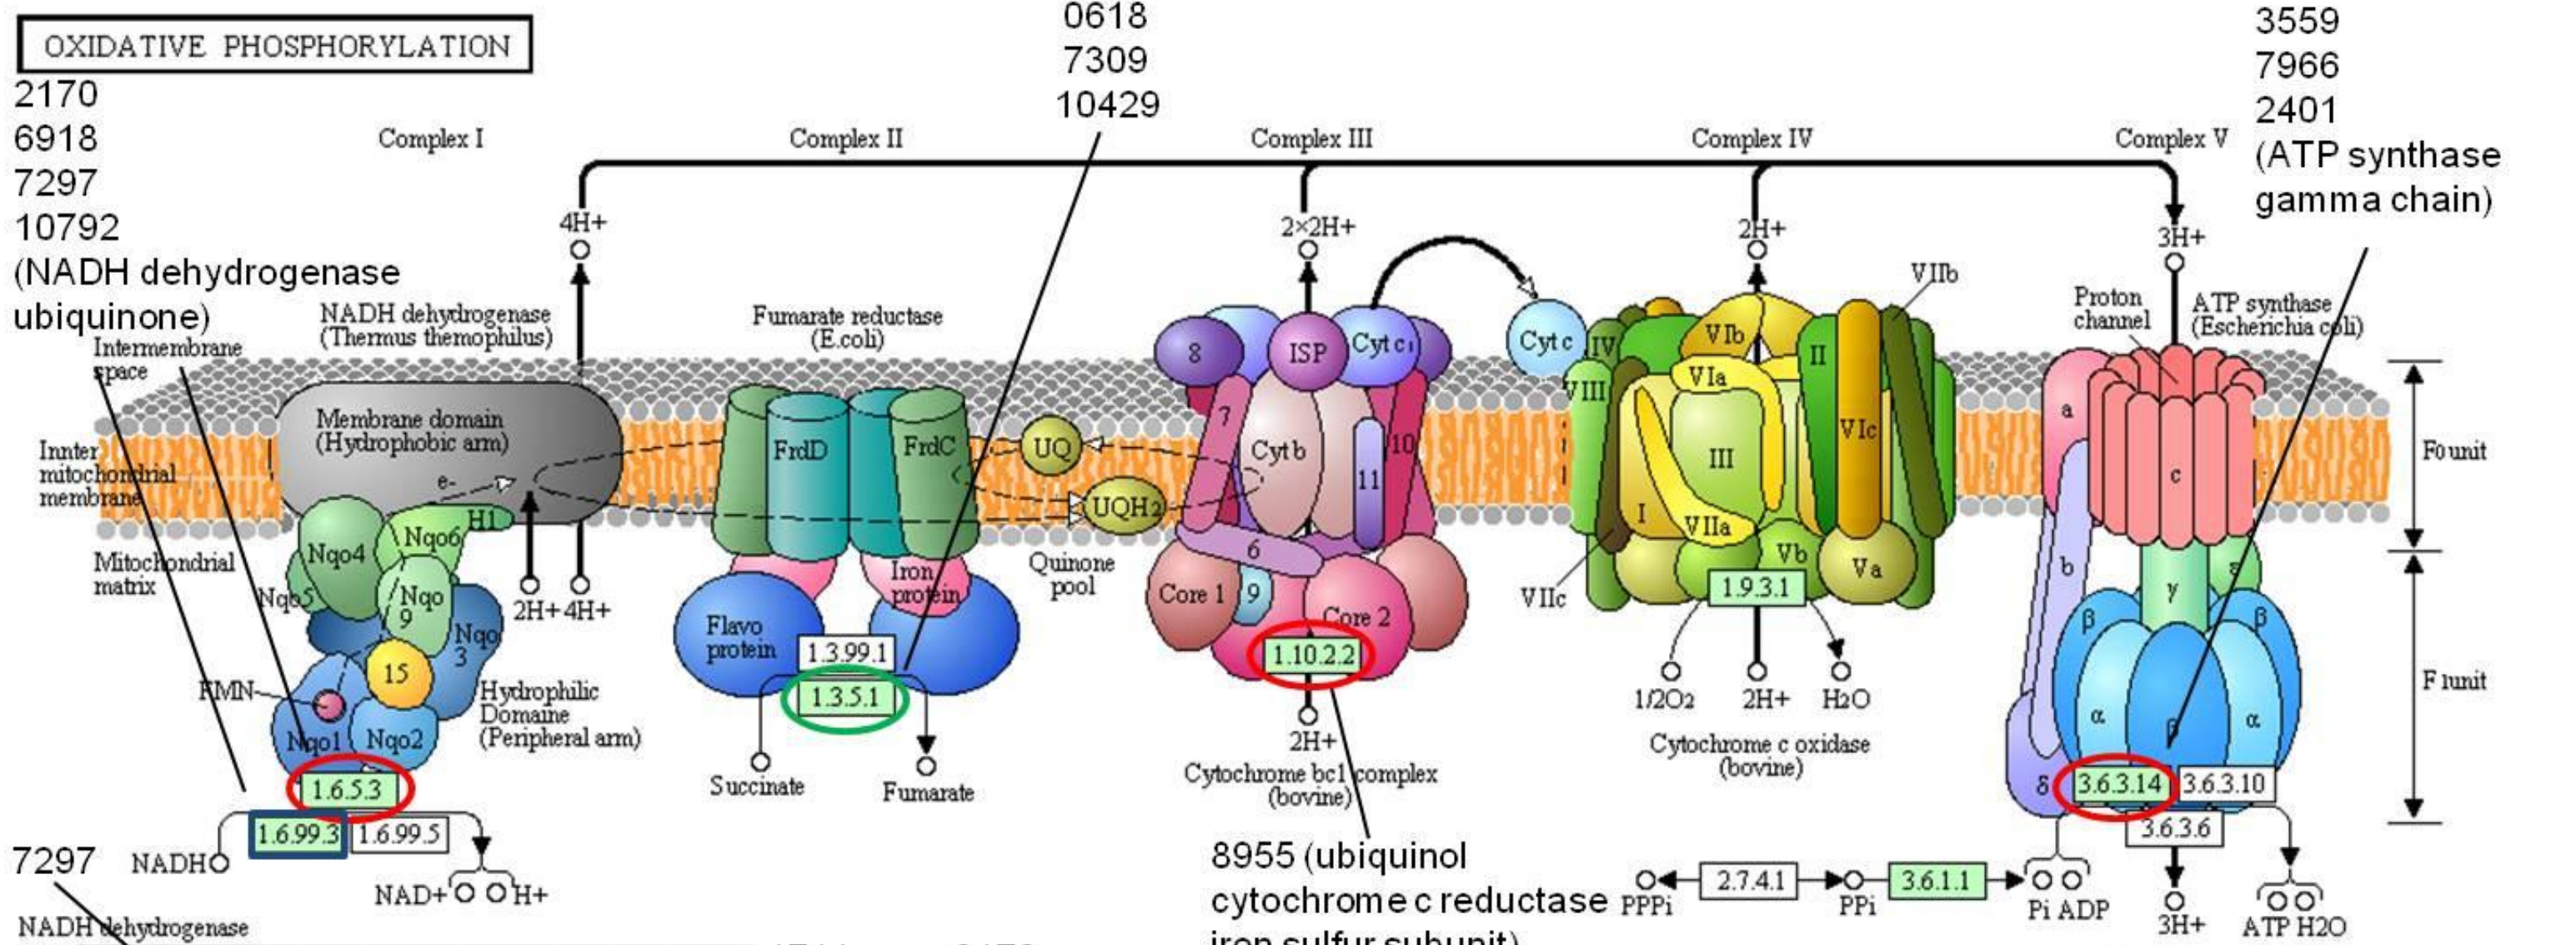

**NADH dehydrogenase**

|     |        |        |        |        |        |        |        |        |        |         |         |         |      |      |      |      |      |
|-----|--------|--------|--------|--------|--------|--------|--------|--------|--------|---------|---------|---------|------|------|------|------|------|
| E   | ND1    | ND2    | ND3    | ND4    | ND4L   | ND5    | ND6    | 1711   | 2170   |         |         |         |      |      |      |      |      |
| E   | Ndufs1 | Ndufs2 | Ndufs3 | Ndufs4 | Ndufs5 | Ndufs6 | Ndufs7 | Ndufs8 | Ndufv1 | Ndufv2  | Ndufv3  |         |      |      |      |      |      |
| B/A | NuoA   | NuoB   | NuoC   | NuoD   | NuoE   | NuoF   | NuoG   | NuoH   | NuoI   | NuoJ    | NuoK    | NuoL    | NuoM | NuoN |      |      |      |
| B/A | NdhC   | NdhK   | NdhJ   | NdhH   | NdhA   | NdhI   | NdhG   | NdhE   | NdhF   | NdhD    | NdhB    | NdhL    | NdhM | NdhN | HoxE | HoxF | HoxU |
| E   | Ndufa1 | Ndufa2 | Ndufa3 | Ndufa4 | Ndufa5 | Ndufa6 | Ndufa7 | Ndufa8 | Ndufa9 | Ndufa10 | Ndufab1 | Ndufa11 |      |      |      |      |      |
| E   | Ndufb1 | Ndufb2 | Ndufb3 | Ndufb4 | Ndufb5 | Ndufb6 | Ndufb7 | Ndufb8 | Ndufb9 | Ndufb10 | Ndufc1  | Ndufc2  |      |      |      |      |      |

**Succinate dehydrogenase / Fumarate reductase**

|     |      |      |      |      |      |      |
|-----|------|------|------|------|------|------|
| E   | SDHC | SDHL | SDHA | SDHB |      |      |
| B/A | SdhC | SdhD | SdhA | SdhB |      |      |
|     |      |      | FrdA | FrdB | FrdC | FrdD |

**Cytochrome c reductase**

|       |      |       |       |      |      |      |      |       |
|-------|------|-------|-------|------|------|------|------|-------|
| E/B/A | ISP  | Cyt b | Cyt 1 |      |      |      |      |       |
| E     | 8955 | COR1  | QCR2  | QCR6 | QCR7 | QCR8 | QCR9 | QCR10 |

**Cytochrome c oxidase**

|     |       |      |      |      |      |       |       |       |       |       |       |       |       |      |       |       |       |       |
|-----|-------|------|------|------|------|-------|-------|-------|-------|-------|-------|-------|-------|------|-------|-------|-------|-------|
| E   | COX10 | COX3 | COX1 | COX2 | COX4 | COX5A | COX5B | COX6A | COX6B | COX6C | COX7A | COX7B | COX7C | COX8 | E/B/A | COX11 | COX15 | COX17 |
| B/A | CyoE  | CyoD | CyoC | CyoB | CyoA |       |       |       |       |       |       |       |       |      |       |       |       |       |
|     |       | CoxD | CoxC | CoxA | CoxB |       |       |       |       |       |       |       |       |      |       |       |       |       |
|     |       | QoxD | QoxC | QoxB | QoxA |       |       |       |       |       |       |       |       |      |       |       |       |       |

**Cytochrome c oxidase, cbb3-type**

|   |   |    |    |     |
|---|---|----|----|-----|
| B | I | II | IV | III |
|---|---|----|----|-----|

**Cytochrome bd complex**

|     |      |      |
|-----|------|------|
| B/A | CydA | CydB |
|-----|------|------|

**F-type ATPase (Bacteria)**

|      |       |       |       |         |   |   |   |
|------|-------|-------|-------|---------|---|---|---|
| beta | alpha | gamma | delta | epsilon | c | a | b |
|------|-------|-------|-------|---------|---|---|---|

**F-type ATPase (Eukaryotes)**

|      |       |       |      |       |         |   |   |
|------|-------|-------|------|-------|---------|---|---|
| beta | alpha | gamma | OSCP | delta | epsilon | c | a |
| b    | e     | f6    | f    | 8     |         |   |   |
| d    | f     | h     | j    | k     | g       |   |   |

**F-type ATPase (Prokaryotes)**

|   |   |   |   |   |   |   |   |
|---|---|---|---|---|---|---|---|
| A | B | C | D | E | F | I | K |
|---|---|---|---|---|---|---|---|

**F-type ATPase (Eukaryotes)**

|   |      |      |    |       |   |   |   |
|---|------|------|----|-------|---|---|---|
| A | B    | C    | D  | E     | F | G | H |
| I | AC39 | 54kD | S1 | lipid |   |   |   |

  gene upregulated in 2La  
  gene downregulated in 2La<sup>+</sup>  
  gene upregulated in 2La and downregulated in 2La<sup>+</sup>
